# Supplementary material for: COPII vesicles contribute to autophagosomal membranes
Source: PubMed Central journal article supplement — J Cell Biol. 2019 Feb 20;218(5):1503–10. doi: 10.1083/jcb.201809032 (PMC6504894; doi:10.1083/jcb.201809032), 2019-02-20
Supplement: JCB_201809032_sm.pdf [file JCB_201809032_sm.pdf]

## Supplemental material

Shima et al., <https://doi.org/10.1083/jcb.201809032>

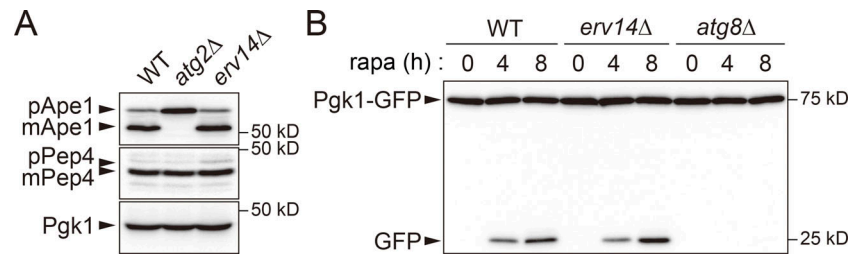

Figure S1. **Erv14 is not important for autophagy.** **(A)** Cells were grown to mid-log phase, treated with rapamycin for 2 h, and examined by immunoblotting using antibodies against Ape1, Pep4, and Pgk1. mApe1, mature Ape1; pApe1, Ape1 proform; mPep4, mature Pep4; pPep4, Pep4 proform. **(B)** Cells expressing Pgk1-GFP were examined by immunoblotting using anti-GFP antibodies as described in A.

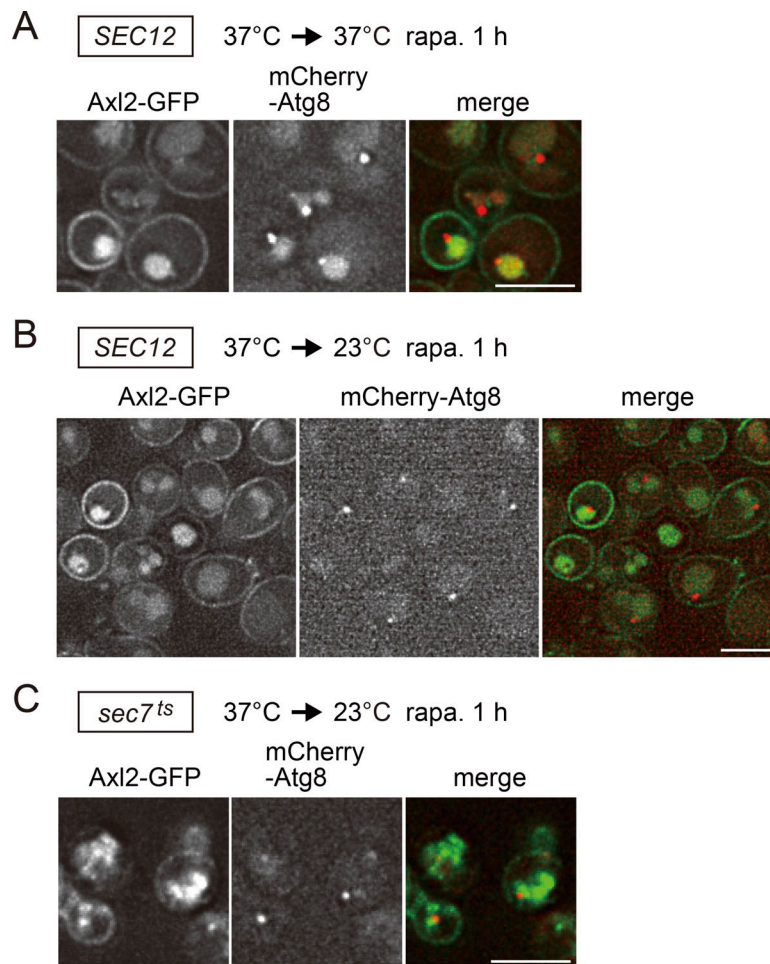

Figure S2. **Axl2-GFP is transferred from the ER to autophagy-related membranes, not via the plasma membrane or Golgi apparatus. (A and B)** *SEC12 SSA1pro-AXL2-GFP mCherry-ATG8* cells were incubated at 37°C for 1 h to allow expression of Axl2-GFP, treated with rapamycin for 1 h at 37°C (A) or 23°C (B), and then observed by fluorescence microscopy. **(C)** *sec7<sup>ts</sup> SSA1pro-AXL2-GFP mCherry-ATG8* cells were incubated at 37°C for 1 h, treated with rapamycin at 23°C for 1 h, and then observed by fluorescence microscopy. Scale bars, 5 μm.

Table S1. **Yeast strains used in this study**

| Name     | Genotype                                                                                                | Figure/Reference/Source    |
|----------|---------------------------------------------------------------------------------------------------------|----------------------------|
| X2180-1A | <i>MATa SUC2 mal mel gal2 CUP1</i>                                                                      | Yeast Genetic Stock Center |
| HMSF162  | X2180-1A <i>sec12-4</i>                                                                                 | Novick et al., 1980        |
| YSMT309  | YNH137 <i>trp1Δ::natNT2 TRP1proΔ::pRS304-p2HSE-AXL2-GFP</i>                                             | None                       |
| YSMT698  | YNH137 <i>trp1Δ::natNT2 TRP1proΔ::pRS304-p2HSE-AXL2-GFP leu2::ATG8pro-2xmCherry-ATG8-hphNT1</i>         | Figs. 1 C and 2 A          |
| YSMT710  | YNH137 <i>trp1Δ::natNT2 TRP1proΔ::pRS304-p2HSE-AXL2-GFP SEC63-mCherry-hphNT1</i>                        | Fig. 1 B                   |
| YSMT711  | YSMT710 <i>erv14Δ::kanMX4</i>                                                                           | Fig. 1 B                   |
| YSMT700  | YSMT698 <i>erv14Δ::kanMX4</i>                                                                           | Fig. 1 C                   |
| YSMT699  | YSMT698 <i>atg2Δ::kanMX4</i>                                                                            | Fig. 2 A                   |
| YSMT708  | YSMT698 <i>ura3Δ::zeoNT3 ura3::GPDpro-APE1-pRS306</i>                                                   | Fig. 2 B                   |
| YSMT739  | YSMT698 <i>erv14Δ::kanMX4 ura3Δ::zeoNT3 ura3::GPDpro-APE1-pRS306</i>                                    | Fig. 2 B                   |
| YSMT700  | YSMT698 <i>ypt7Δ::kanMX4</i>                                                                            | Fig. 2 (C-E)               |
| YSMT699  | YSMT698 <i>erv14Δ::kanMX4 ypt7Δ::zeoNT3</i>                                                             | Fig. 2 (C-E)               |
| YSMT314  | YSMT309 <i>ATG8pro-2xmCherry-ATG8-hphNT1 ypt7Δ::kanMX4</i>                                              | Fig. 3 (A, B, and E-J)     |
| YSMT483  | YSMT309 <i>ATG8pro-2xmCherry-ATG8-hphNT1 erv14Δ::zeoNT3 ypt7Δ::kanMX4</i>                               | Fig. 3 (C and B)           |
| W303-1A  | <i>MATa ade2-1 ura3-1 his3-11,15 trp1-1 leu2-3,112 can1-100</i>                                         | Thomas and Rothstein, 1989 |
| AIDEG1   | W303-1A <i>ADE2 ura3-1::pNHK53 (ADH1pro-OsTIR1-9Myc)</i>                                                | Fig. S1 A                  |
| AIDEG22  | AIDEG1 <i>atg2Δ::kanMX4</i>                                                                             | Fig. S1 A                  |
| YSMT469  | AIDEG1 <i>erv14Δ::kanMX4</i>                                                                            | Fig. S1 A                  |
| BY4741   | <i>MATa his3Δ1 leu2Δ0 met15Δ0 ura3Δ0</i>                                                                | Brachmann et al., 1998     |
| YNH1344  | BY4741 <i>PGK1-EGFP-hisMX4</i>                                                                          | Fig. S1 B                  |
| YNH1345  | BY4741 <i>PGK1-EGFP-hisMX4 atg8Δ::zeoNT3</i>                                                            | Fig. S1 B                  |
| YSMT482  | BY4741 <i>PGK1-EGFP-hisMX4 erv14Δ::zeoNT3</i>                                                           | Fig. S1 B                  |
| YSMT612  | X2180-1 <i>trp1Δ::natNT2 TRP1proΔ::pRS304-p2HSE-AXL2-GFP leu2::ATG8pro-2xmCherry-ATG8-hphNT1</i>        | Fig. S2 (A and B)          |
| YSMT607  | X2180-1 <i>sec7-1 trp1Δ::natNT2 TRP1proΔ::pRS304-p2HSE-AXL2-GFP leu2::ATG8pro-2xmCherry-ATG8-hphNT1</i> | Fig. S2 C                  |

## References

- Brachmann, C.B., A. Davies, G.J. Cost, E. Caputo, J. Li, P. Hieter, and J.D. Boeke. 1998. Designer deletion strains derived from *Saccharomyces cerevisiae* S288C: a useful set of strains and plasmids for PCR-mediated gene disruption and other applications. *Yeast*. 14:115-132. [https://doi.org/10.1002/\(SICI\)1097-0061\(19980130\)14:2<115::AID-YEA204>3.0.CO;2-2](https://doi.org/10.1002/(SICI)1097-0061(19980130)14:2<115::AID-YEA204>3.0.CO;2-2)
- Novick, P., C. Field, and R. Schekman. 1980. Identification of 23 complementation groups required for post-translational events in the yeast secretory pathway. *Cell*. 21:205-215. [https://doi.org/10.1016/0092-8674\(80\)90128-2](https://doi.org/10.1016/0092-8674(80)90128-2)
- Thomas, B.J., and R. Rothstein. 1989. The genetic control of direct-repeat recombination in *Saccharomyces*: the effect of *rad52* and *rad1* on mitotic recombination at *GAL10*, a transcriptionally regulated gene. *Genetics*. 123:725-738.
